# Supplementary material
Source: MDPI journal article supplement (https://www.mdpi.com/2071-1050/10/4/960)
Supplement: s1 [file s1]

**Table S1.** Land use and land cover (LULC) classification

| Major type |               | Sub-type |                           |                                                                                                                                               |
|------------|---------------|----------|---------------------------|-----------------------------------------------------------------------------------------------------------------------------------------------|
| No.        | Major type    | No.      | Sub-type                  | description                                                                                                                                   |
| 1          | Cropland      | -        | -                         | Existing and newly developed arable land covered with crops all year round.                                                                   |
| 2          | Forest        | -        | -                         | The areas with natural or artificial forest, including arbor, shrub and bamboo forest etc.                                                    |
| -          | -             | 21       | High density forest       | The forest canopy > 30%, consisting of timber forest, economic forest and forest for shelter.                                                 |
| -          | -             | 22       | shrub                     | The areas with shrub height below 2 meters and canopy >40%.                                                                                   |
| -          | -             | 23       | Open forest               | The areas with forest canopy between 10% and 30%.                                                                                             |
| -          | -             | 24       | Other forest              | The newly planted forest and orchard.                                                                                                         |
| 3          | Grassland     | -        | -                         | Grassland of vegetation coverage more than 5% and the grassland under the open forest that the canopy is lower than 10%.                      |
| -          | -             | 31       | High coverage grassland   | The natural grassland of vegetation coverage > 50%.                                                                                           |
| -          | -             | 32       | Medium coverage grassland | The natural and improved grassland of vegetation coverage between 20% and 50%.                                                                |
| -          | -             | 33       | Low coverage grassland    | The natural sparse grassland with the lower coverage between 5% and 20%.                                                                      |
| 4          | Wetland       | -        | -                         | The areas with marsh, fen or water, whether natural or artificial, permanent or temporary, including river, lake, reservoir, marsh and paddy. |
| 5          | Built-up land | -        | -                         | The areas used for residence, industry, commerce and transportation.                                                                          |
| 6          | Bare land     | -        | -                         | The unused areas including sandy and rocky land and areas with no or sparse vegetation.                                                       |
